# Supplementary material for: Epithelia of the Penile Urethra
Source: Preprints.org preprint supplement (doi:10.20944/preprints202410.0042.v1), 2024-10-01
Supplement: Supplementary file 1 [file supplementary]

**Supplementary data**


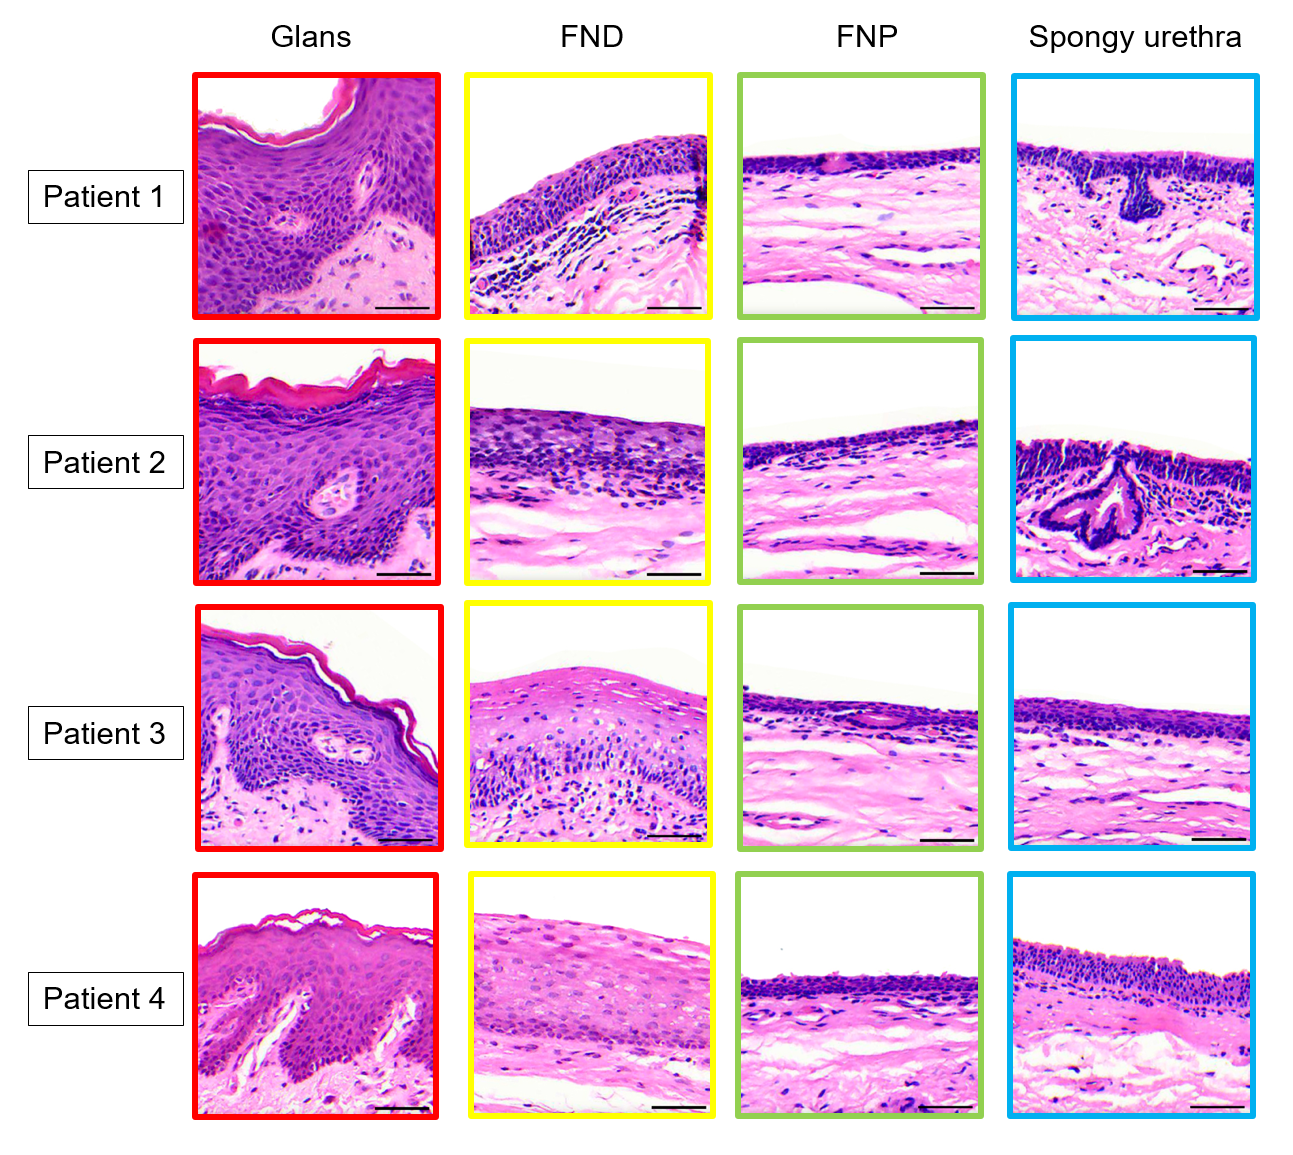


**Supplementary figure 1: Representative photographs of Hematoxylin-Eosin staining of the urethra.** Tissue slices were stain from 4 regions of the urethra, the glans (in red), the distal Fossa Navicularis (FND, in yellow), the proximal Fossa Navicularis (FNP, in green) and the spongy urethra (in blue) for 4 donor patients. Scale bars represent 100 µm.


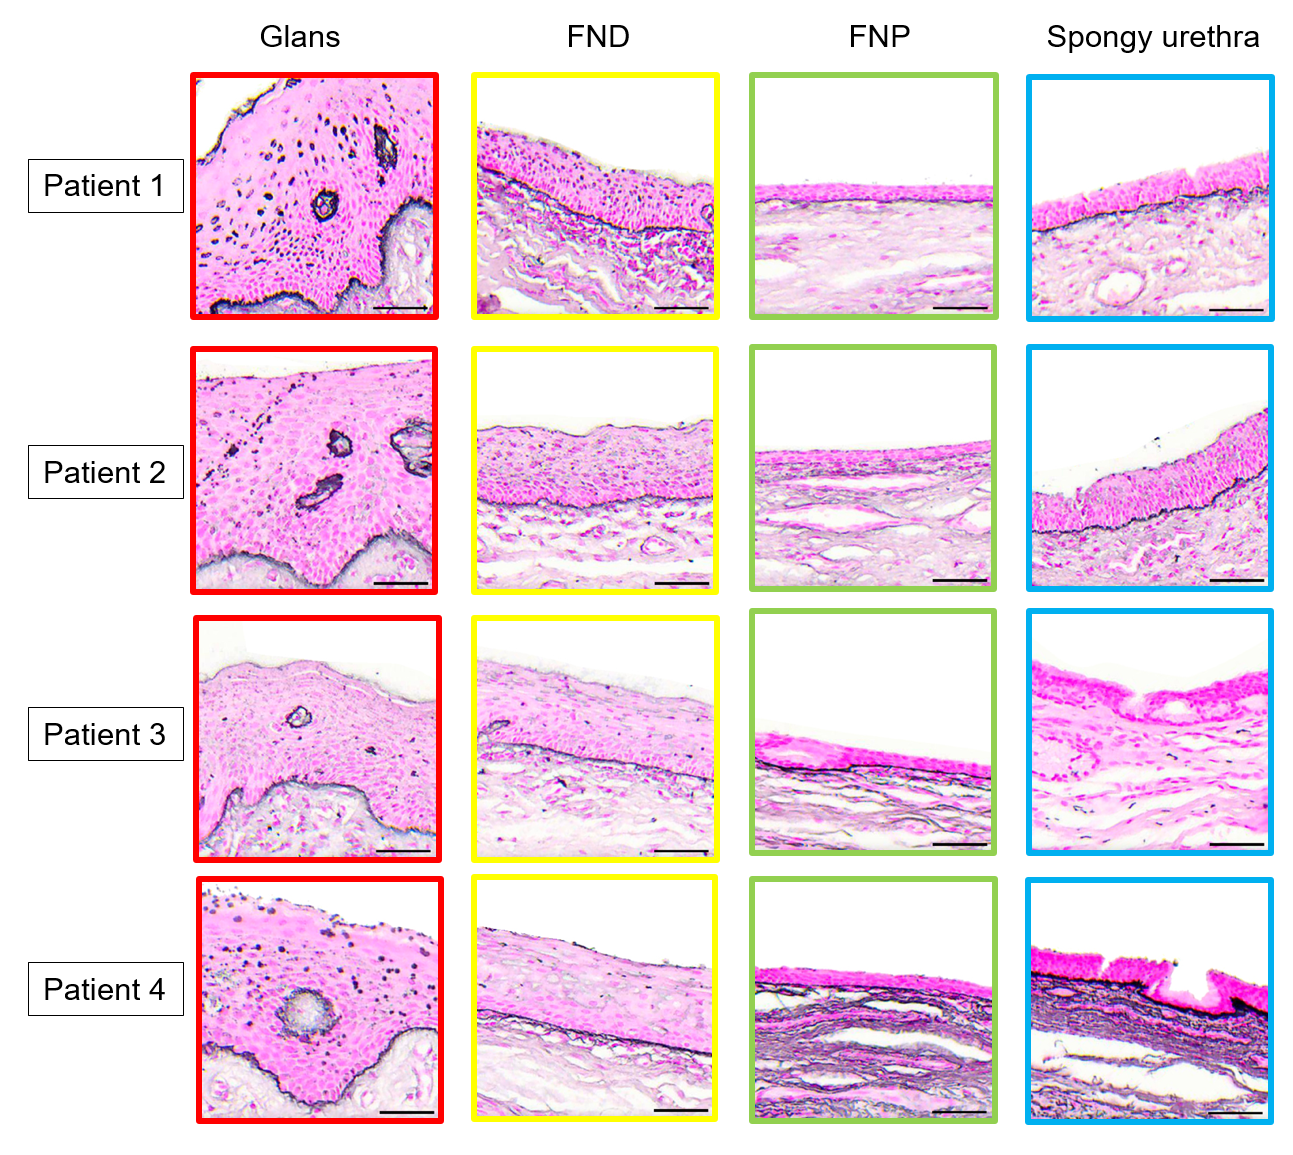


**Supplementary figure 2: Representative photographs of Laidlaw coloration of the urethra.** Tissue slices were stain from 4 regions of the urethra, the glans (in red), the distal Fossa Navicularis (FND, in yellow), the proximal Fossa Navicularis (FNP, in green) and the spongy urethra (in blue) for 4 donor patients. Scale bars represent 100 µm.


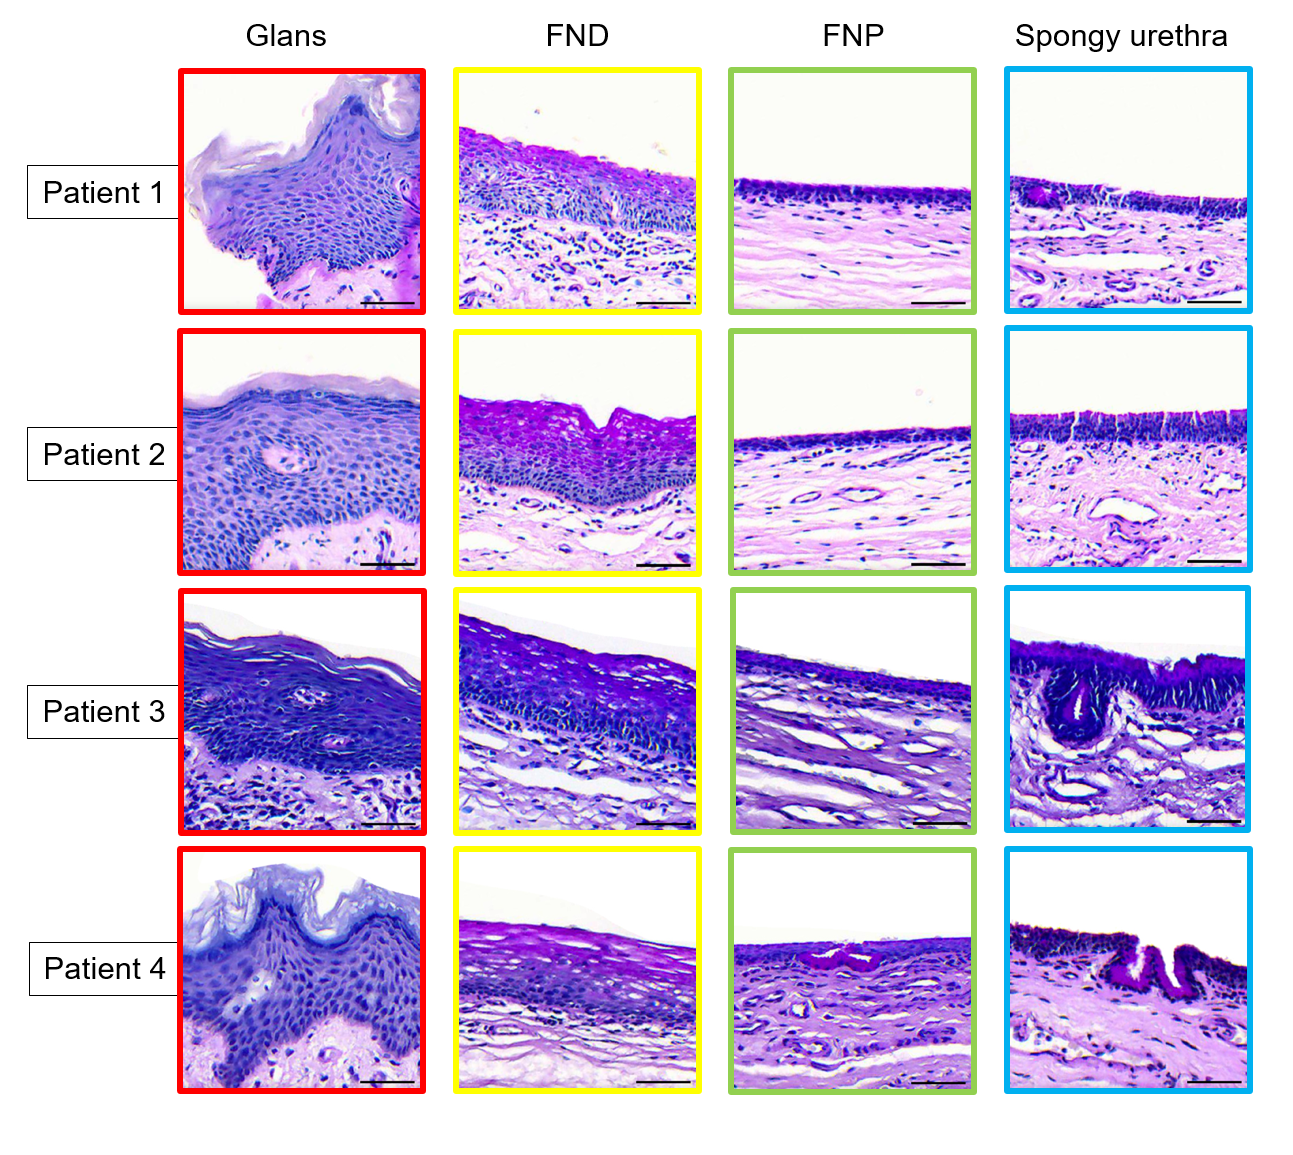


**Supplementary figure 3: Representative photographs of the Periodic-Acid Schiff staining of the urethra.** Tissue slices were stain from 4 regions of the urethra, the glans (in red), the distal Fossa Navicularis (FND, in yellow), the proximal Fossa Navicularis (FNP, in green) and the spongy urethra (in blue) for 4 donor patients. Scale bars represent 100 µm.


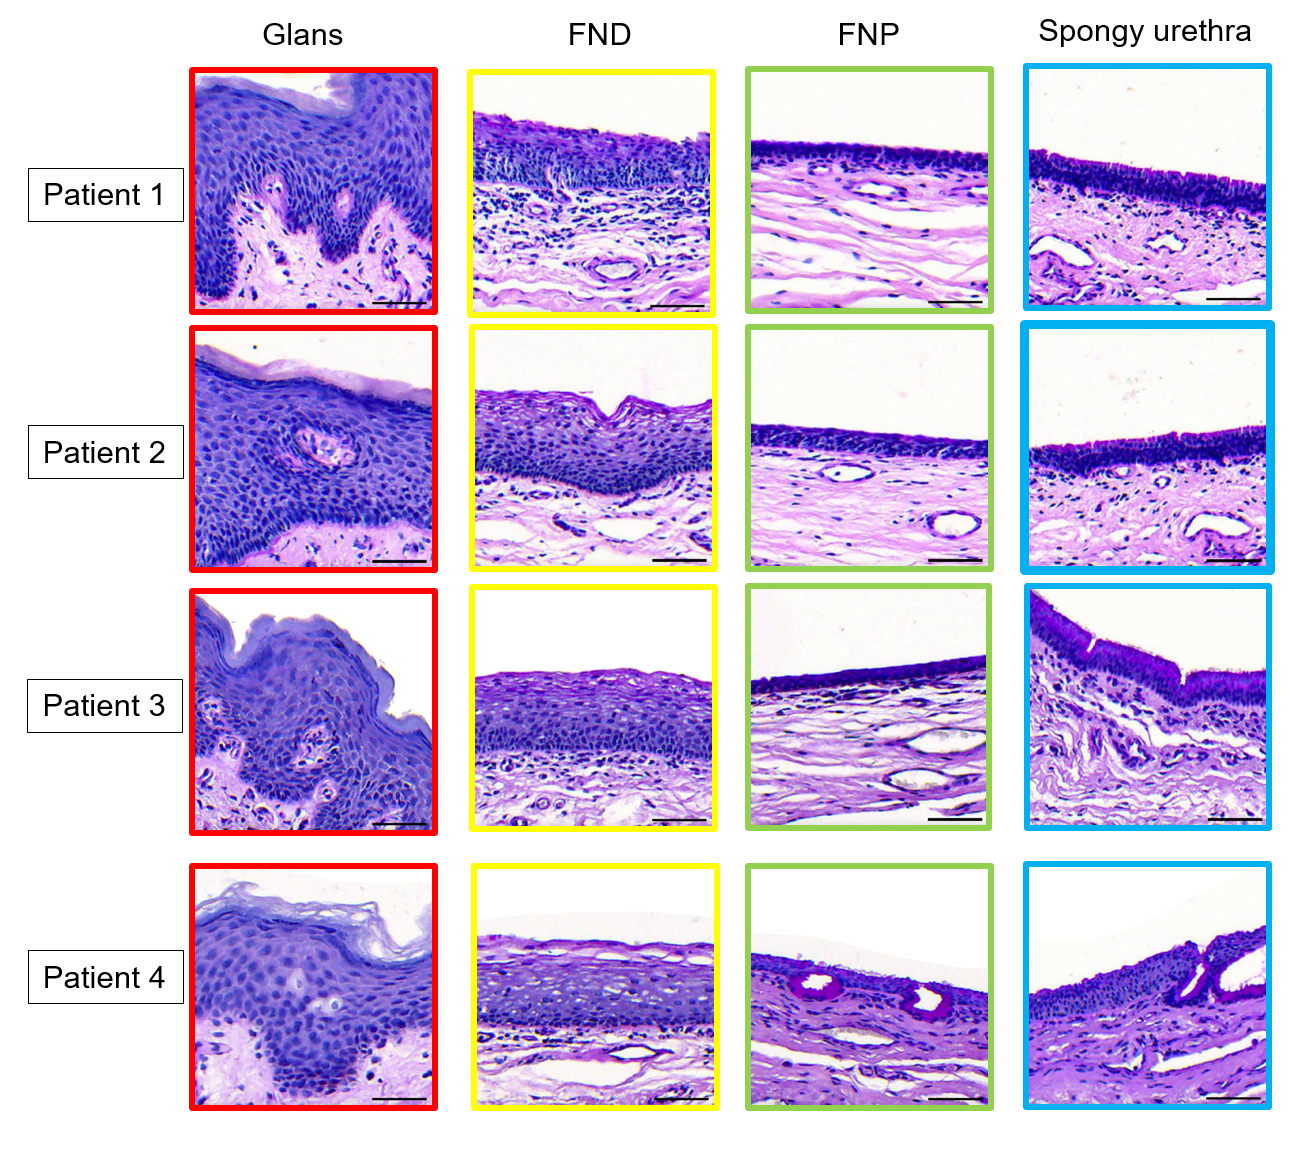


**Supplementary figure 4: Representative photographs of the Periodic-Acid Schiff staining of the urethra after diastase digestion**. Tissue slices were stain from 4 regions of the urethra, the glans (in red), the distal Fossa Navicularis (FND, in yellow), the proximal Fossa Navicularis (FNP, in green) and the spongy urethra (in blue) for 4 donor patients. Scale bars represent 100 µm.
